# Supplementary material for: Global mapping transcriptional start sites revealed both transcriptional and post-transcriptional regulation of cold adaptation in the methanogenic archaeon Methanolobus psychrophilus
Source: PubMed Central journal article supplement (PMC5378194; doi:10.1038/srep09209), 2015-03-18
Supplement: srep09209-s1.pdf [file srep09209-s1.pdf]

1 **Global mapping transcriptional start sites revealed both transcriptional and**  
2 **post-transcriptional regulation of cold adaptation in the methanogenic archaeon**  
3 ***Methanolobus psychrophilus***

4  
5 Jie Li<sup>1,#</sup>, Lei Qi<sup>1,#</sup>, Yang Guo<sup>2</sup>, Lei Yue<sup>1</sup>, Yanping Li<sup>2</sup>, Weizhen Ge<sup>2</sup>, Jun Wu<sup>2,\*</sup>,  
6 Wenyuan Shi<sup>3</sup> and Xiuzhu Dong<sup>1,\*</sup>

7 <sup>1</sup> State Key Laboratory of Microbial Resources, Institute of Microbiology, Chinese  
8 Academy of Sciences, No.1 Beichen West Road, Beijing 100101, People's Republic  
9 of China

10 <sup>2</sup>Novogene Bioinformatics Institute, 21st Floor, Jinma building B area, Xueqing Road,  
11 Beijing 100083, People's Republic of China

12 <sup>3</sup> Department of Microbiology, Immunology and Molecular Genetics, University of  
13 California, 10833 Le Conte Avenue, Los Angeles, CA90095, USA.

14 \* To whom correspondences should be addressed. Xiuzhu Dong, Tel: +86 10 6480  
15 7413; Fax: +86 10 6480 7429; Email: [dongxz@im.ac.cn](mailto:dongxz@im.ac.cn). Correspondence may also be  
16 addressed to Jun Wu, Tel: +86 10 8283 7567; Fax: +86 10 8283 7567; Email:  
17 [wujun@novogene.cn](mailto:wujun@novogene.cn).

18 # the authors contributed equally to this work.

19

20 **Supplementary figures and table legends:**

21 **Figure S1. Correlation between RNA-seq determined RPKM of the spike-in**  
22 **RNAs and the final concentration in RNA pools of 18°C culture (A) and 8°C**  
23 **culture (B).** External RNA Controls Consortium (ERCC) spike-in control mixes  
24 (Ambion) was used as internal control. Concentrations of the added ERCC RNA and  
25 the RPKMs determined by whole-transcript sequencing were shown at x- and y-axis,  
26 respectively. The correlation coefficients, indicating the accuracy of the RNA-seq  
27 detection for RNA levels.  $r$ , correlation coefficient calculated by “pearson” method;  
28  $R^2$ , the square of  $r$ ;  $\tau$ , correlation coefficient calculated by “kendall” method;  $n$ ,  
29 numbers of the ERCC RNA with RPKM >2 in RNA-seq detection.

30 **Figure S2. Examples of operon determination through integration of primary**  
31 **gTSSs and whole-transcript sequencing.** Based on the prediction results of both  
32 DOOR database and Rockhopper method, operons were defined as the DNA regions  
33 with a continuous coverage by the whole-transcript sequencing reads and a mapped  
34 upstream gTSS. The schematic diagrams of the operons were generated by IGV  
35 genome browser. (A) Representative cDNA mappings to the ribosomal protein operon  
36 consisted of Mpsy\_1124 (*rpl15*) to 1146 (*rpl3*) that are encoded by lagging strand.  
37 Only one gTSS was detected upstream of Mpsy\_1146 in the 5'-end (+) libraries at two  
38 temperatures, and continuous mapping in the whole transcript sequencing library (w)  
39 was found on the operon. (B) Representative cDNA mappings to the exosomal operon  
40 retrieved from 5'-end (+)/(-) and whole-transcript (w) transcriptomes of 18 and 8°C  
41 libraries showed temperature-induced suboperon organization. Primary gTSSs (blue

42 arrows) were detected for Mpsy\_2722 (*rpl15e*), Mpsy\_2725 (*rpp14*), Mpsy\_2726  
43 (*psmA*), Mpsy\_2732 (*rpoP*), Mpsy\_2735 (*pfdB*), Mpsy\_2737 (*paak*), Mpsy\_2738  
44 (ACT domain) and Mpsy\_2739 (DUF2103) in both 18 and 8°C 5'-end (+) library, and  
45 coexpression of Mpsy\_2722 (*rpl15e*) to 2725 (*rpp14*), Mpsy\_2726 (*psmA*) to 2732  
46 (*rpoP*) were detected in 18°C whole-transcript library. Whereas, the gTSS of  
47 Mpsy\_2726 (*psmA*) was increased in 8°C 5'-end (+) library, and coexpression of  
48 Mpsy\_2726 (*psmA*) to 2732 (*rpoP*) was also detected in the 8°C whole-transcript  
49 library. Blue arrows, gTSSs detected in (+) library. (+), 5'-end library for primary  
50 transcripts ; (-), 5'-end library for both primary and processed transcripts. On the top  
51 of each diagram, the genome location is indicated.

52 **Figure S3. Sequence-logo of promoter regions based on dRNA-seq identified**  
53 **TSSs.** The upstream regions of the TSSs (up to 500 nt) were aligned using MEME  
54 and consensus visualized with Web Logo. Upstream sequences were aligned for (A)  
55 1371 out of 1680 gTSSs (81.6%), (B) 622 out of 1110 aTSSs (56%), (C) 305 out of  
56 1440 iTSSs (21.2%) and (D) 22 out of 190 nTSSs (11.6%), respectively. Promoter  
57 motifs (TATA boxes located at -23 to -30 nt and BRE boxes centered at -35 nt) are  
58 predicted. MEME searched promoter sequences for gTSS, nTSS, aTSS and iTSS are  
59 listed in the Promoter column in Dataset S1, Dataset S4, Dataset S5 and Dataset S6,  
60 respectively.

61 **Figure S4. 5'-RACE assay verified selected gTSSs detected by dRNA-seq.**  
62 Agarose gels (2.5%) showed RT-PCR products that were treated with (+) or without  
63 (-) tobacco acid pyrophosphatase (TAP). Gene annotation and locus number are

64 indicated in each gel. The primers used in 5'-RACE are listed in Supplementary Table  
65 S2. Arrows indicate the 5'-RACE bands that confirmed the dRNA-seq identified TSSs.  
66 M, DNA molecular markers and the lengths are shown on the right.

67

68 **Figure S5. Changing ratios of 5' UTR length in each of the 84 genes of R15**  
69 **showing temperature-related gTSS selection.** By dividing the length (nt) difference  
70 of 5' UTR in 18°C 5'- vs. 8°C 5'-end libraries over the relative shorter length at each  
71 temperature for each gene, the changing ratios of the 5' UTR lengths are calculated  
72 for the 84 genes that exhibited temperature-related gTSS selection in 18°C 5'- vs. 8°C  
73 5'-end libraries. Blue bars represent the genes with increased 5' UTR length at 8°C,  
74 and red bars represent the genes with increased 5' UTR length at 18°C.

75

76 **Figure S6. Multiple gTSSs identified in a Hsp 20 gene.** (A) IGV genome browser  
77 showed the dRNA-seq reads mapping detected in 5' (+)/(-) libraries of a heat shock  
78 protein Hsp20 gene (Mpsy\_0869). That revealed three TSSs both in 18 and 8°C  
79 5'-end libraries, and reads mapped more to upstreamed TSS2 and TSS3 in 18°C  
80 library. cDNAs from the whole-transcript sequencing library (w) covered the ORF  
81 were remarkably increased in the 8°C library. (B) 5'-RACE assay verified dRNA-seq  
82 detected three gTSSs. Agarose gels (2.5%) showed the RT-PCR products that were  
83 treated with (+) or without (-) tobacco acid pyrophosphatase (TAP) indicated above  
84 the lanes. Blue arrows point the TSSs. Oligos used in 5'-RACE are listed in  
85 Supplementary Table S2. (C) Primer extension assay of Mpsy\_0869 mRNA in 8 and

86 18°C cultures. 10 µg mRNA from each cultures was used, and the oligos  
87 complementary to <50 nt downstream the start codon was used and listed in  
88 Supplementary Table S2. dRNA-seq identified three TSSs in the two 5'-end libraries  
89 were specified in the two sides of the gel. **(D)** Mfold predicted the secondary  
90 structures of the Hsp20 5' UTR generated from TSS1. Arrow indicates the TSSs, and  
91 bases in red represent the predicted RBS.

92

93 **Figure S7. A group of conserved cold-induced sRNA candidates in R15. (A)**

94 Alignment of nine conserved sRNAs. Conserved promoter elements (BRE and TATA  
95 box) and dRNA-seq determined TSSs are indicated. Inside the red broken line frame  
96 is a conserved motif upstream the promoter elements, tentatively named “cold box”.

97 **(B)** Northern blot analysis of the temperature-responsive differential expressions of  
98 the conserved sRNAs. Using four probes that each target one of the nine sRNAs  
99 detected all the nine. Probed sRNAs are indicated on the top of the lanes.

100

101 **Figure S8. dRNA-seq identified a tRNA-Pyl in the R15 transcriptome which**

102 **facilitates amending automatic annotations on methylamine methyltransferase**

103 **genes. (A)** cDNA mapping to tRNA-Pyl gene showed the gTSS upstream the mature

104 tRNA-Pyl (72nt, grey bullet). On the top shows the genome location of tRNA-Pyl

105 gene. **(B)** Genome architecture of the genes for tRNA-Pyl synthesis. **(C)** Schematic

106 diagram of the genome architecture by automatic annotation showing that genes

107 encoding methylamine:corrinoid methyltransferases are disrupted by the pyrrolysine  
108 encoding amber stop codon. Solid line framed are the corrected genes by joining the  
109 automatic annotated gene fragments by considering UAG stop codon to be translated  
110 to pyrrolysine. This is indicated by the downstream characteristic PYLIS (pyrrolysine  
111 insertion sequence) sequence. Those inside the broken line frames are the genes  
112 should be joined according to multi-alignments. Open bullets indicate putative genes.  
113 Detailed gene re-annotations were listed in Table S2.

114

115 **Figure S9. Antisense transcriptions and their correlation with the complemented**  
116 **mRNA abundance in response to temperature change.** (A) IGV genome browser  
117 visualized the dRNA-seq reads mapping in 18°C 5'-end (+)/(-) library, that revealed  
118 an antisense transcription (aTSS) covered a manganese transporter gene (Mpsy\_0424)  
119 (upper panel) and two aTSSs covered an amino acid transporter (Mpsy\_1700) (lower  
120 panel). Underneath showed the whole-transcript cDNA reads mapping (w) to the two  
121 genes. Grey bullets represent the genes and their genome locations as indicated on the  
122 diagram top. Inside the frame indicates the predicted promoter sequences, of which  
123 the blue and red bases represent TATA box and BRE. +1 specifies TSS. (B) mRNAs  
124 with  $\geq 2$ -fold difference at abundance in 8 vs. 18°C library were retrieved from  
125 Dataset S2 for correlation analysis. Y-axis and x-axis indicate the fold changes of  
126 antisense transcription and the complemented transcript abundance in 8 vs. 18°C  
127 library, respectively. Each dot represents a pair of antisense and sense transcript, and  
128 dots distributed in phase I and III indicate positive correlations, while in phase II and

129 IV indicate negative correlations.

130

131 **Figure S10. Internal transcription and that generated putative possible functions.**

132 (A) Location of the iTSSs inside an ORF. By equally dividing an ORF into twenty

133 portions (x axis), numbers of the iTSSs location (y axis) in each portion is counted. 25%

134 iTSSs situate at the proximal N-terminal 1/4 region and some are the authentic gTSSs

135 of an ORF, so facilitates re-annotations for 51 ORFs (Dataset S9). 30% iTSSs situate

136 at the 1/4 region proximal to C-terminal, those can be a gTSS of the downstream ORF,

137 or to generate a suboperon. (B) Representative iTSSs at N-terminus were the

138 authentic gTSSs of the ORF that enabled correction of the automatic annotation for

139 DNA polymerase Pol 2 (Mpsy\_1484, upper panel) and a F<sub>420</sub>-ligase (Mpsy\_2175,

140 lower panel). Grey bullet, automatic annotated ORF, blue bullet, re-annotated ORF.

141 (C) Representative iTSSs at C-terminus acted as the gTSS of the downstream ORFs.

142 Upper panel, two iTSSs in Mpsy\_1892 were the gTSSs of Mpsy\_1891. Lower panel,

143 an iTSS in Mpsy\_2875 acted as the gTSS of Mpsy\_2874. Grey arrow, iTSS; blue

144 arrow, gTSS; red arrow, aTSS; green arrow, nTSS. Inside the frame indicate the

145 predicted promoter sequences, of which the blue and red bases represent TATA box

146 and BRE, while the three bold red bases encode the start codon. +1 specifies TSS.

147

148 **Figure S11. Internal transcription generated truncated proteins that can perform**

149 **alterative functions in the multi-domain proteins.** IGV genome browser visualized

150 the dRNA-seq reads mapping in 18°C 5'-end library that revealed the internal

151 transcriptions (iTSSs) of two genes encoding signal transduction histidine kinase of  
152 (A), Mpsy\_0031 and (B) Mpsy\_0087. Underneath showed the whole-transcript cDNA  
153 (w) read mapping to the two genes. Grey bullets represent the genes and the genome  
154 locations indicated on the top of the diagram. Inside the frame indicate the predicted  
155 promoter sequences, of which the blue and red bases represent TATA box and BRE,  
156 while the three bold red bases encode the start codon. +1 specifies TSS. Predicted  
157 protein domains generated by internal transcription from the two genes were shown  
158 underneath.

159

160

161

162

163

164

165

166

167

168

169

170

171

172



173 **Table S1.** Overview of the sequencing data information

174 **Table S2.** Primers and probes used in this study

175 **Table S3.** gTSSs identified in the 18 and 8°C 5'-end libraries of *M. psychrophilus* R15  
176 by dRNA-seq and amended with whole-transcript sequencing (Excel file)

177 **Table S4.** Differential expression of the whole-transcript of *M. psychrophilus* R15  
178 grown at 18 vs. 8°C (Excel file)

179 **Table S5.** Operon map of *M. psychrophilus* R15 (Excel file)

180 **Table S6.** nTSSs identified in *M. psychrophilus* R15 (Excel file)

181 **Table S7.** aTSSs identified in *M. psychrophilus* R15 (Excel file)

182 **Table S8.** iTSSs identified in *M. psychrophilus* R15 (Excel file)

183 **Table S9.** Multiple gTSSs and temperature-induced gTSS selection in *M.*  
184 *psychrophilus* R15 (Excel file)

185 **Table S10.** Top 10 most abundant transcripts in TSS semi-quantitative analysis of R15  
186 cultured at two temperatures

187 **Table S11.** Functional RNAs identified in *M. psychrophilus* R15 by dRNA-seq  
188 (Excel file)

189 **Table S12.** Re-annotated genes for *M. psychrophilus* R15 based on dRNA-seq  
190 identification of TSSs (Excel file)

191

192

193

194

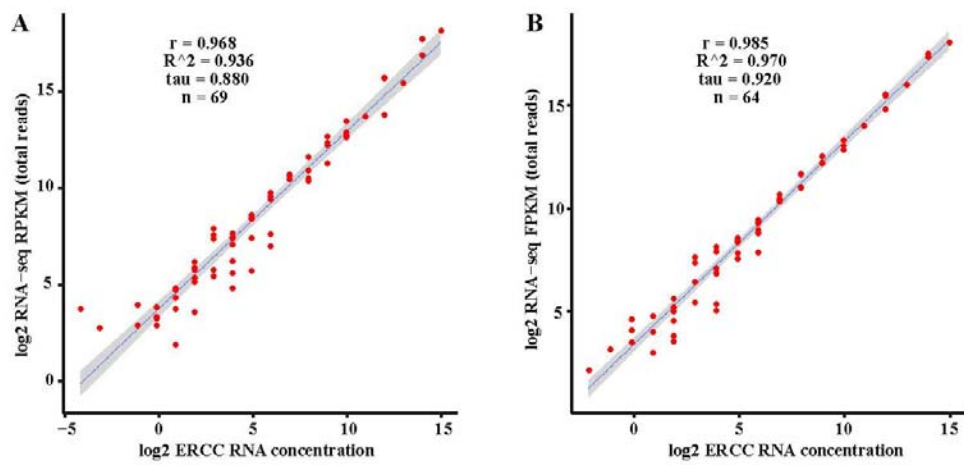

Figure S1

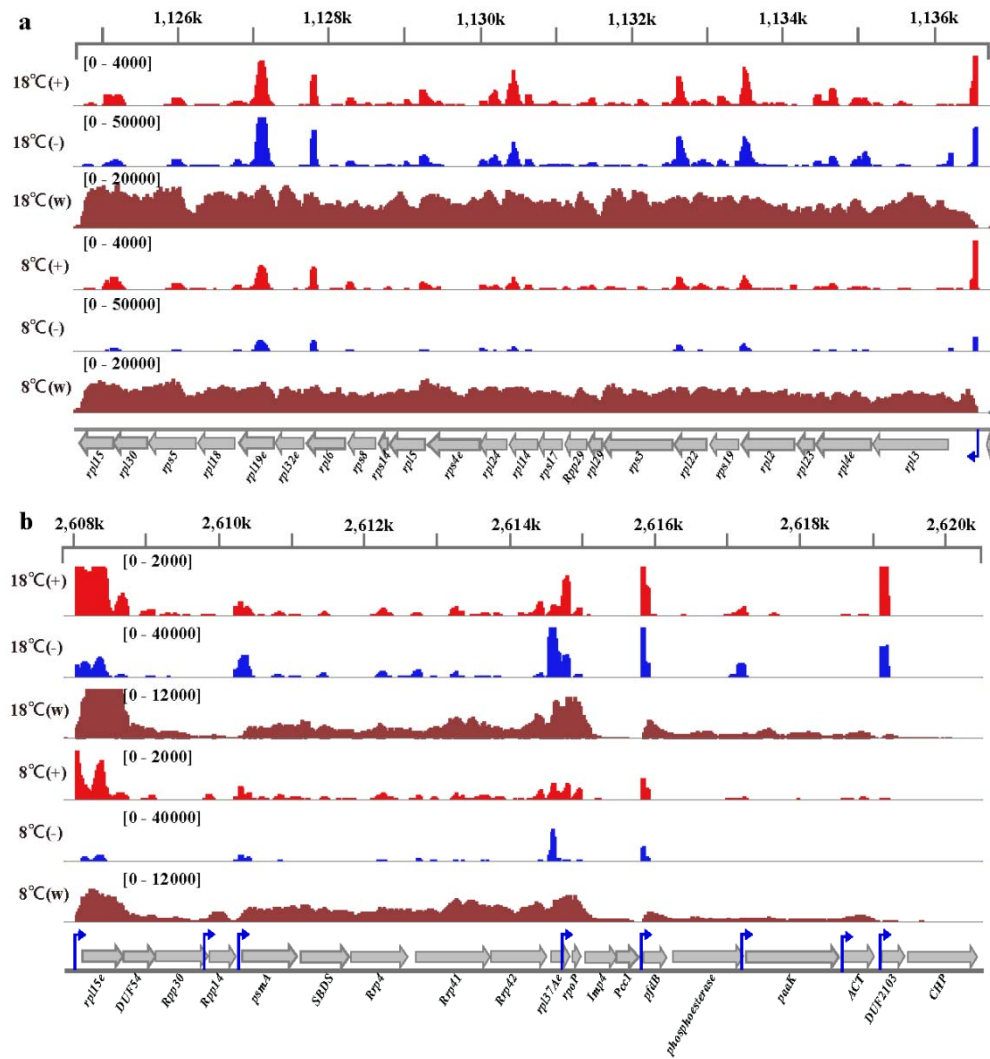

Figure S2

195

196

197

198

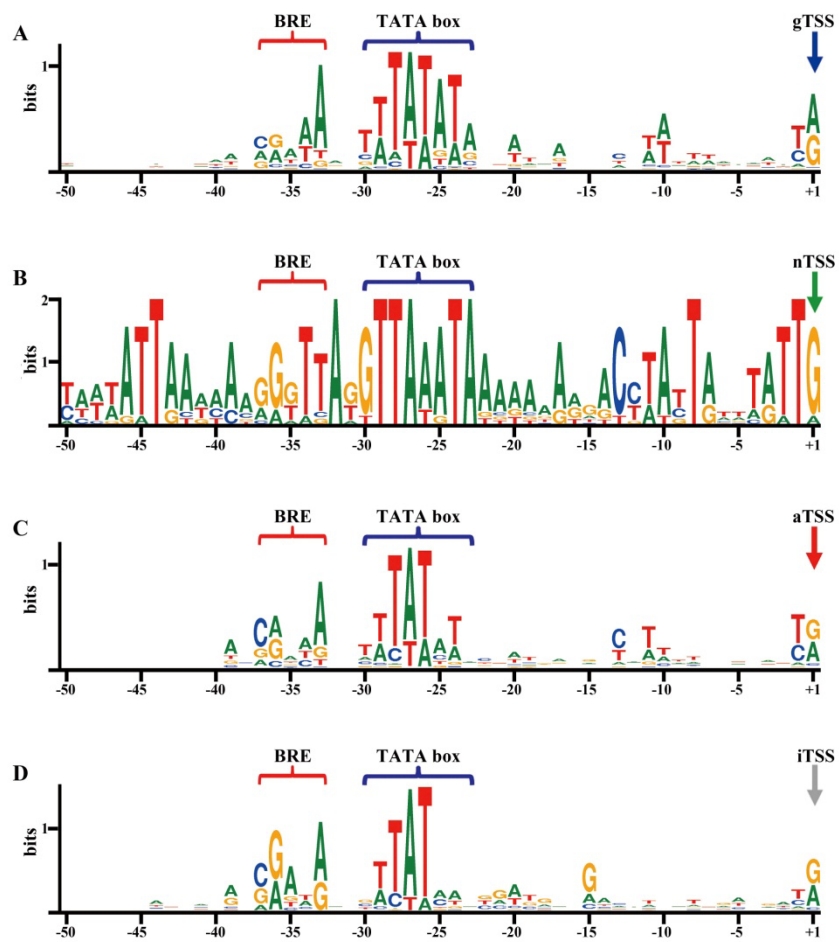

Figure S3

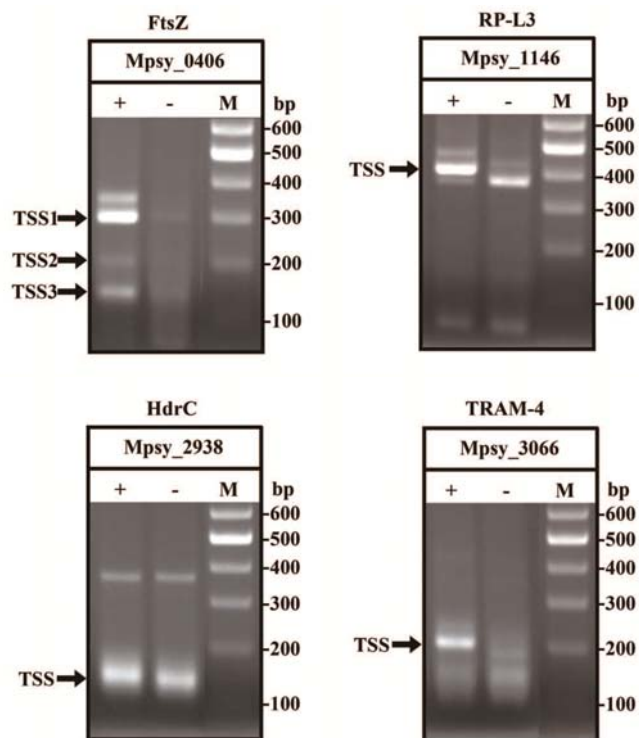

Figure S4

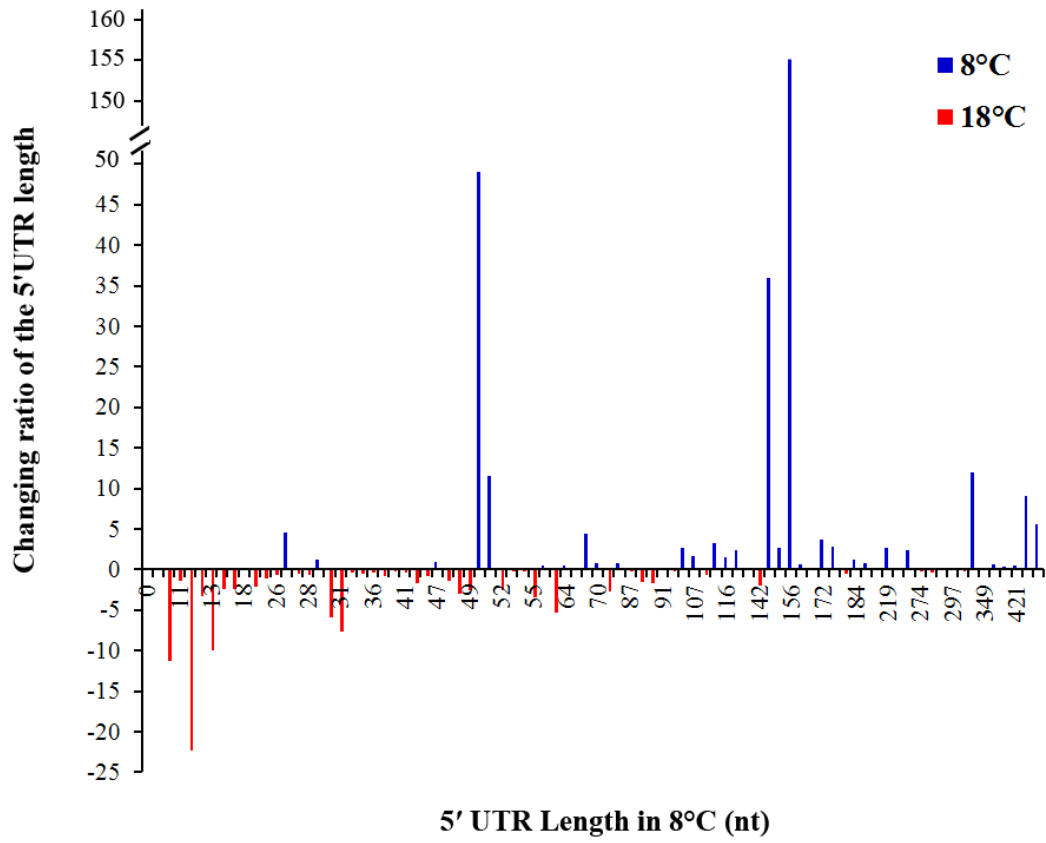

5' UTR Length in 8°C (nt)

Figure S5

201

202

203

204

205

206

207

208

209

210

211

212

213

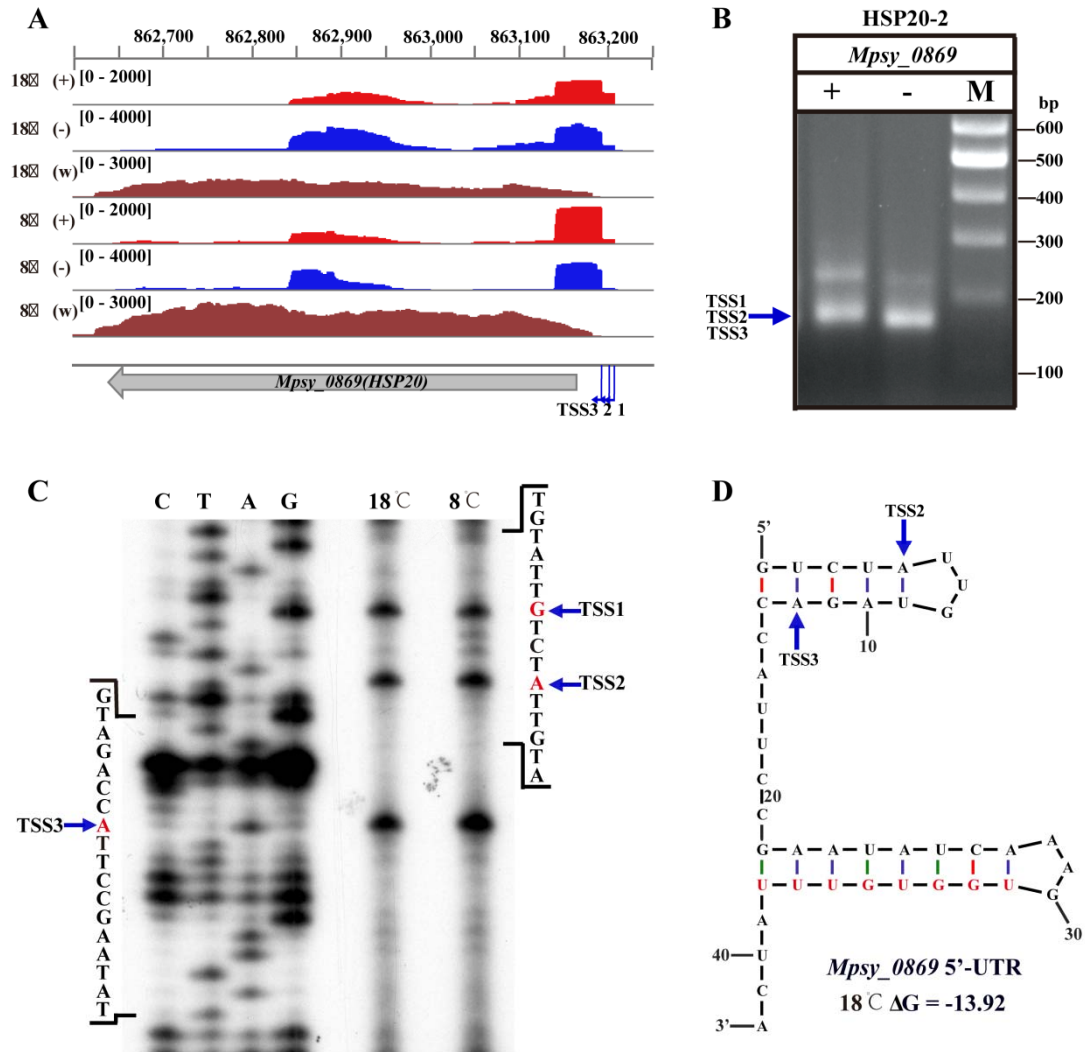

214

215

Figure S6

216

217

218

219

220

221

222

223

224

A

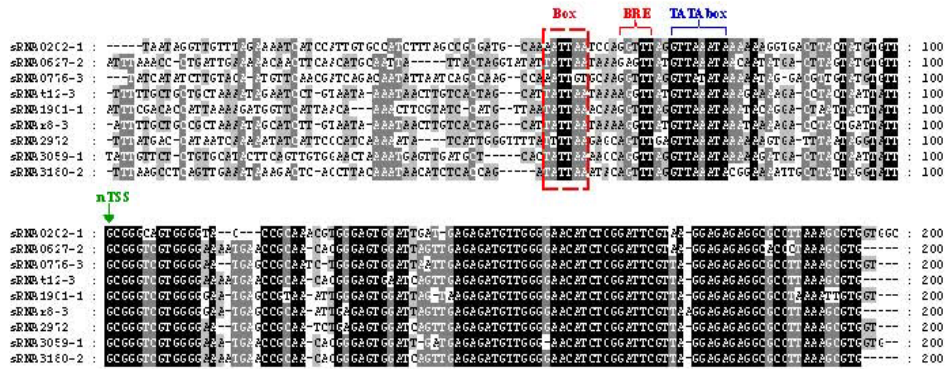

229

230

231

232

233

234

235

B

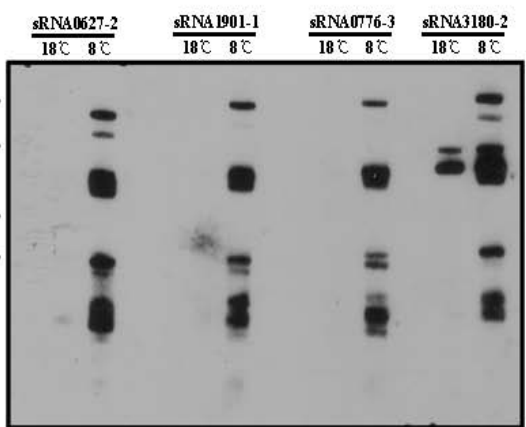

240

241

242

243

244

245

246

Figure S7

247

248

249

250

251

252

253

254

255

256

257

258

259

260



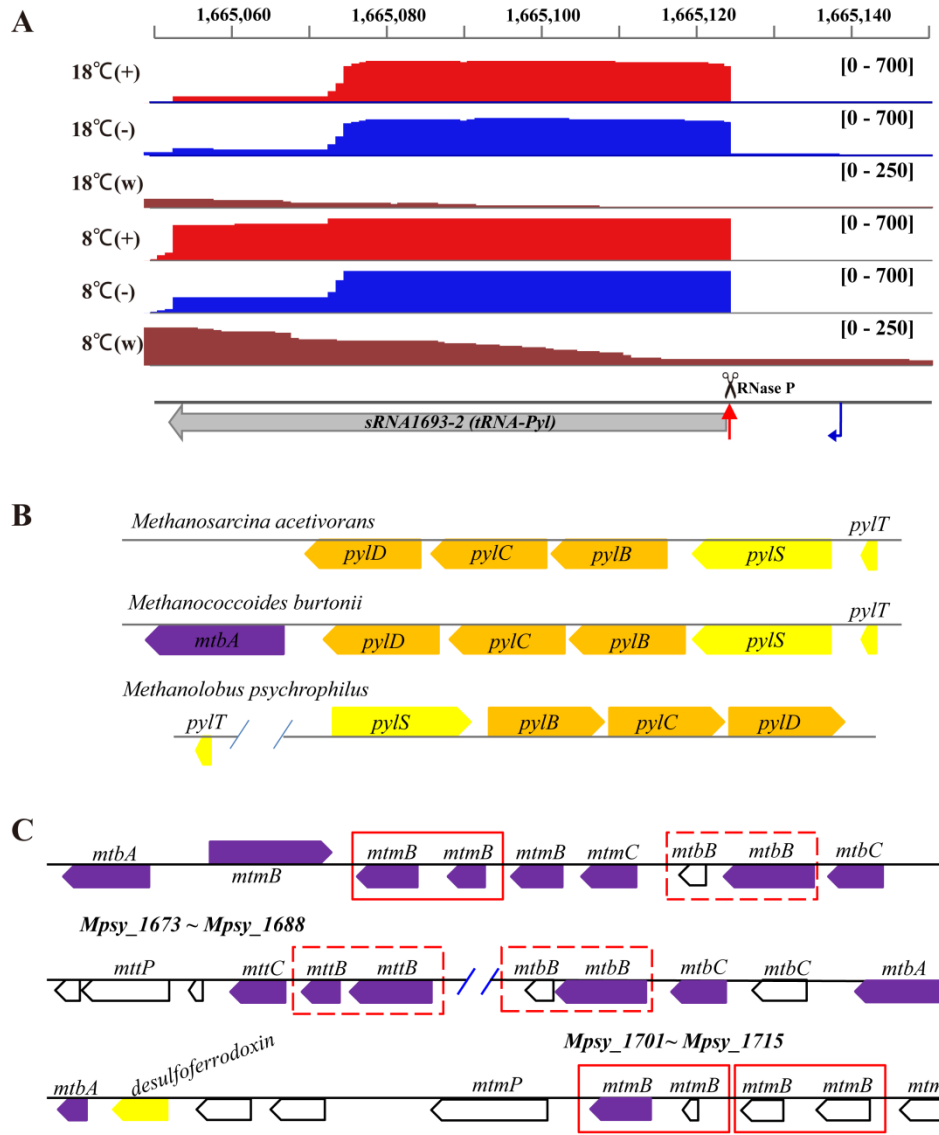

Figure S8

262

263

264

265

266

267

268

269

270

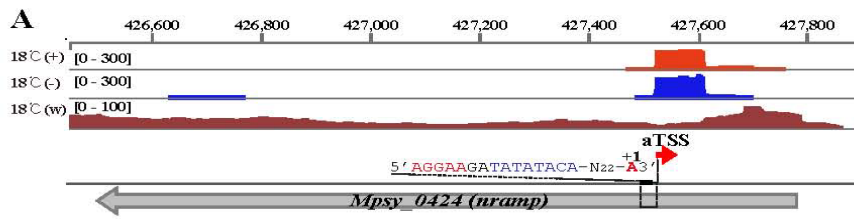

272

273

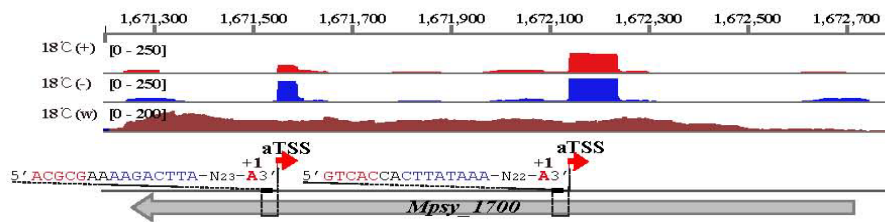

275

276

**B**

277

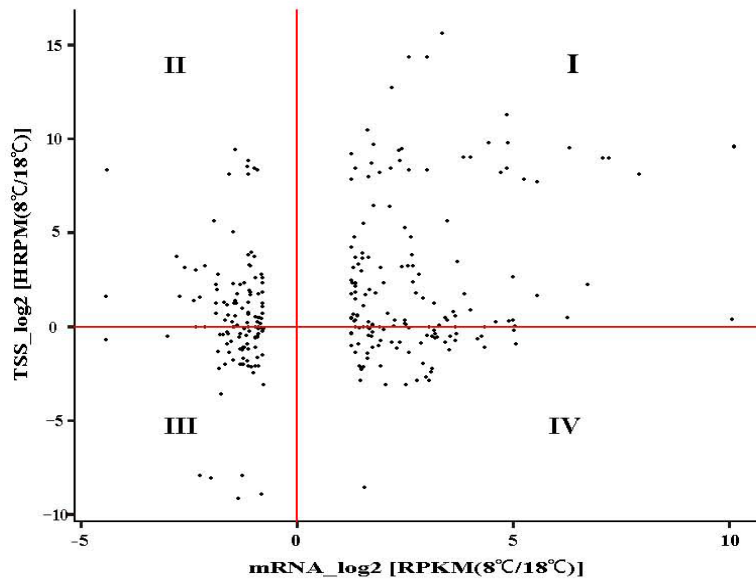

278

279

280

281

282

283

284

Figure S9

285

286

287

288

289

290

291

292

293

294

295

296

297

298

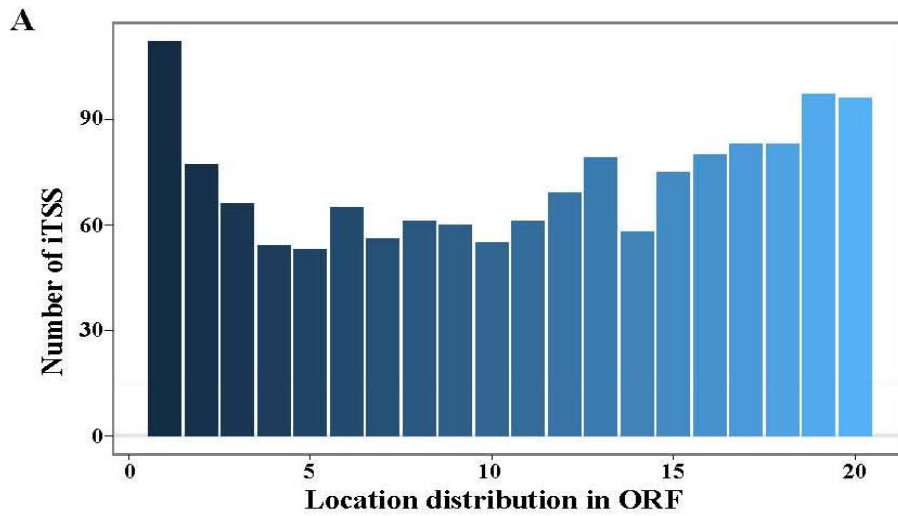

299

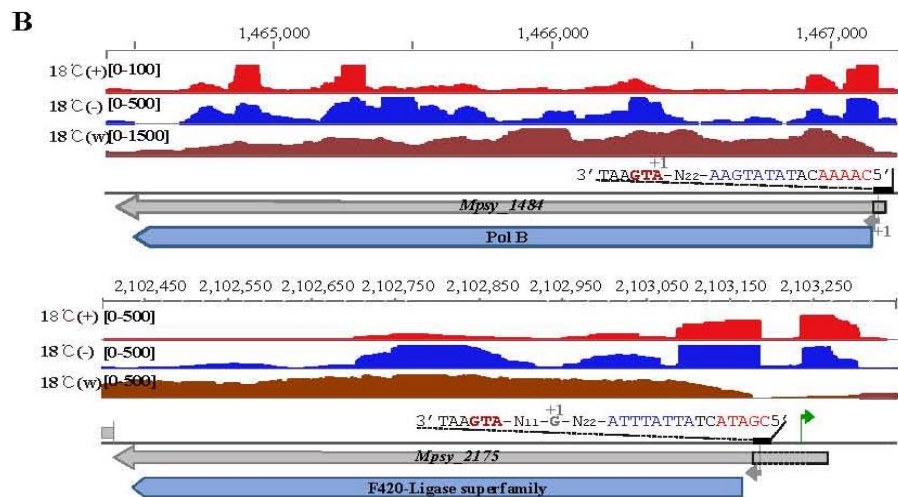

305

306

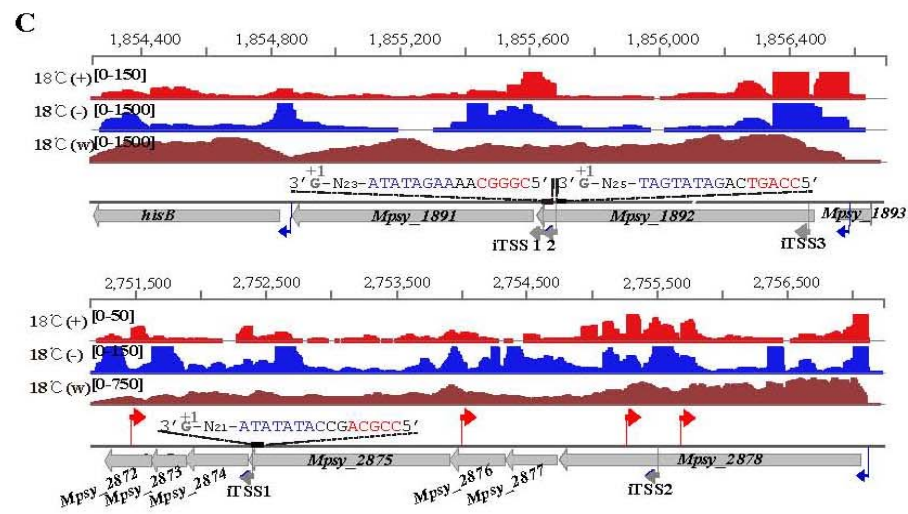

316

317

Figure S10

318  
 319  
 320  
 321  
 322  
 323  
 324  
 325  
 326  
 327  
 328  
 329  
 330  
 331

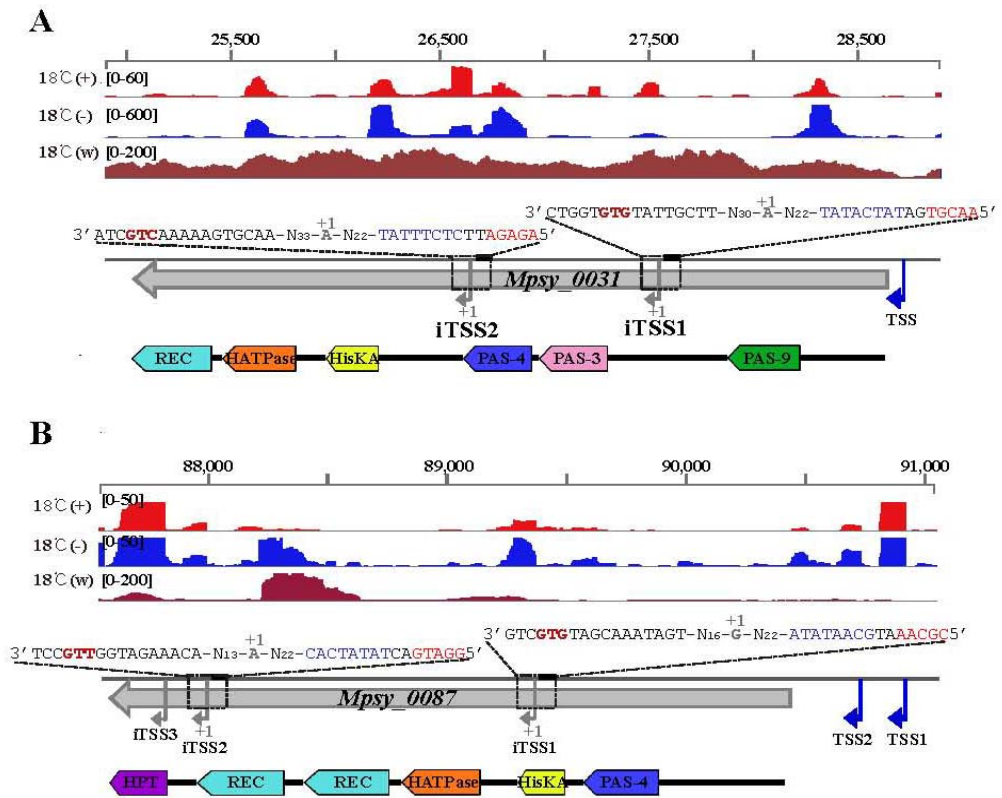

Figure S11

332 **Supplementary Tables**

333

334

Table S1. Overview of the sequencing data information

| <b>Culture temperature</b> | <b>Library type</b> | <b>rRNA (%)</b> | <b>Clean data<sup>#</sup></b> | <b>Mapping rate (%)</b> | <b>Mapped reads</b> |
|----------------------------|---------------------|-----------------|-------------------------------|-------------------------|---------------------|
| 18°C                       | (+)                 | 12.27           | 11,555,975                    | 52.72                   | 6,092,170           |
|                            | (-)                 | 17.20           | 28,610,456                    | 75.09                   | 21,482,367          |
|                            | (w)                 | 1.24            | 32,655,016                    | 98.58                   | 32,190,288          |
| 8°C                        | (+)                 | 2.45            | 13,080,637                    | 33.37                   | 4,364,495           |
|                            | (-)                 | 11.24           | 17,228,189                    | 55.50                   | 9,561,136           |
|                            | (w)                 | 1.47            | 32,441,532                    | 98.21                   | 31,859,599          |

335 #, clean data shows the number of total sequenced reads with rRNA removed.

336

337

338

339

340

341

342

343

344

345

346

347

348

349

350

351

352

353

354

355

356

Table S2. Primers and probes used in this study

| Primer              | Sequence (5'→3')                                                       | Application      |
|---------------------|------------------------------------------------------------------------|------------------|
| 5'-RACE-F           | CAGACTGGATCCGTCGTC                                                     | 5'-RACE          |
| 0075-5RACE-RT       | TCCCCTCAAACCCAAAGATCG                                                  | 5'-RACE          |
| 0075-5RACE-R        | GGCCTGTCAGCGTCGTCAC                                                    | 5'-RACE          |
| 0406-5RACE-RT       | GCGATCGTCTGGCGGTACTCT                                                  | 5'-RACE          |
| 0406-5RACE-R        | CCTGGACTATCGATTGCACATT                                                 | 5'-RACE          |
| 0869-5RACE-RT       | CACCCGGACGCTGCGAGAT                                                    | 5'-RACE          |
| 0869-5RACE-R        | CATCCATGTCTACACCGAACCTT                                                | 5'-RACE          |
| 1146-5RACE-RT       | CCGGCCACGAATTAACCTC                                                    | 5'-RACE          |
| 1146-5RACE-R        | CCTCGTCTTGGTCTGTGTCCT                                                  | 5'-RACE          |
| 1554-5RACE-RT       | CCCATGCTATCCAGTCTCCGTAA                                                | 5'-RACE          |
| 1554-5RACE-R        | GCGTGCTTCCGTCCCCTC                                                     | 5'-RACE          |
| 1637-5RACE-RT       | CCGAAGGTGACACTCCCAGATAG                                                | 5'-RACE          |
| 1637-5RACE-R        | TGGGCAATCTCGAAGTTTAAC                                                  | 5'-RACE          |
| 2938-5RACE-RT       | AGGCCAAGCTTTTCCATCTGC                                                  | 5'-RACE          |
| 2938-5RACE-R        | GCGGATTTTGTAGGCCTGTTC                                                  | 5'-RACE          |
| 3066-5RACE-RT       | TTCCGTCGCCTTCTCTTGC                                                    | 5'-RACE          |
| 3066-5RACE-R        | GCGATGTCTTCAATTGTCACTTCA                                               | 5'-RACE          |
| 0075-PE-RT          | TCCCCTCAAACCCAAAGATCG                                                  | Primer extension |
| 0075-PE-F           | TGTCATTGGAAGTGAACATG                                                   | Primer extension |
| 0075-PE-R           | ACATGCTCCATCGGAAAGCC                                                   | Primer extension |
| 0869-PE-RT          | TTCAAAAAAAGTTCGCCTCTT                                                  | Primer extension |
| 0869-PE-F           | CGATCAAAGCAAATAGTTAAGA                                                 | Primer extension |
| 0869-PE-R           | CACTGAAGTCCTCATCATCCAG                                                 | Primer extension |
| 5SDNAProbe          | CGGACTTATCTTCTGTGTTCCGAAAAGGGTA<br>CAGGAATTGCCCGCCGCTATGGCCGCCA        | Northern blot    |
| C/Dbox1 DNA Probe   | TGTGCCTCAGTACTCATAGGGTTCATCATCG<br>ATCAGAACGATTTTCTCATCACAGGCAC        | Northern blot    |
| C/Dbox2 DNA Probe   | TAGCGCGGCATCAGTTAGAGTAATCATCATCCT<br>TTGCTCAGTGGGGGTAAGTATCATCATCGCCGC | Northern blot    |
| nTSS393711DNAProbe  | AACGAATCCGAAATATTCCTCAATATTTCTTC<br>CTGGACATTGCGAGTGACATTACCCGC        | Northern blot    |
| nTSS2892333DNAProbe | TTGGTCTGCATATATCTCAGAAAAGTGTCTC<br>AATGGACATTTTCGACCCCGTTCTCCCC        | Northern blot    |
| nTSS602251DNAProbe  | CCCCAACATCTCTCAACTAATCCACTCCCGT<br>GTTGCGGTTCAATTTCCCCACGACCCGC        | Northern blot    |
| nTSS1863145DNAProbe | TTCCCCAACATCTCTTACTAATCCACTCCCAA<br>TTTACGGCTCATTTCCCCACGACCCGC        | Northern blot    |
| nTSS760266DNAProbe  | TTCCCCAACATCTCTCAATTAATCCACTCCCA<br>GATTGCGGCTCATTTCCCCACGACCCGC       | Northern blot    |
| nTSS3071986DNAProbe | ATCTCTCAACTGATCCACTCCCGTGTGCGGT<br>TCATTTTCCCCACGACCCGCAATACCT         | Northern blot    |

359 Table S10. Top 10 most abundant transcripts in TSS semi-quantitative analysis of R15  
 360 cultured at two temperatures

| No. | RNA annotation      | 18°C HRPM | RNA annotation      | 8°C HRPM |
|-----|---------------------|-----------|---------------------|----------|
| 1   | SRP RNA             | 76514     | sRNA3016-1          | 80615    |
| 2   | sRNA3016-1          | 27649     | SRP RNA             | 49042    |
| 3   | Mpsy_t49 (tRNA-Gly) | 18316     | Mpsy_t49 (tRNA-Gly) | 25387    |
| 4   | sRNA2126-2          | 16477     | Mpsy_t27 (tRNA-Asn) | 14286    |
| 5   | sRNA2068-1          | 14852     | sRNA0273-3          | 14214    |
| 6   | Mpsy_1673 (mtbA)    | 8320      | sRNA2068-1          | 11610    |
| 7   | Mpsy_t45 (tRNA-Leu) | 7214      | sRNA2871            | 11419    |
| 8   | Mpsy_t3 (tRNA-Leu)  | 6626      | Mpsy_t45 (tRNA-Leu) | 10303    |
| 9   | Mpsy_0908 (mtaC)    | 6089      | sRNA1901-1          | 9662     |
| 10  | Mpsy_t39 (tRNA-Met) | 4799      | sRNA2126-2          | 6717     |

361

362 SRP: signal recognition particle.

363

364

365

366

367

368

369

370

371

372

373

374

375

376

377

378

379

380

381

382

383
